# Supplementary figures and images for: CD44-targeted hyaluronic acid–curcumin reverses chemotherapeutics resistance by inhibiting P-gp and anti-apoptotic pathways
Source: PubMed Central journal article supplement — RSC Adv. 2019 Dec 11;9(70):40873–82. doi: 10.1039/c9ra08202f (PMC9076387; doi:10.1039/c9ra08202f), 2019-12-11

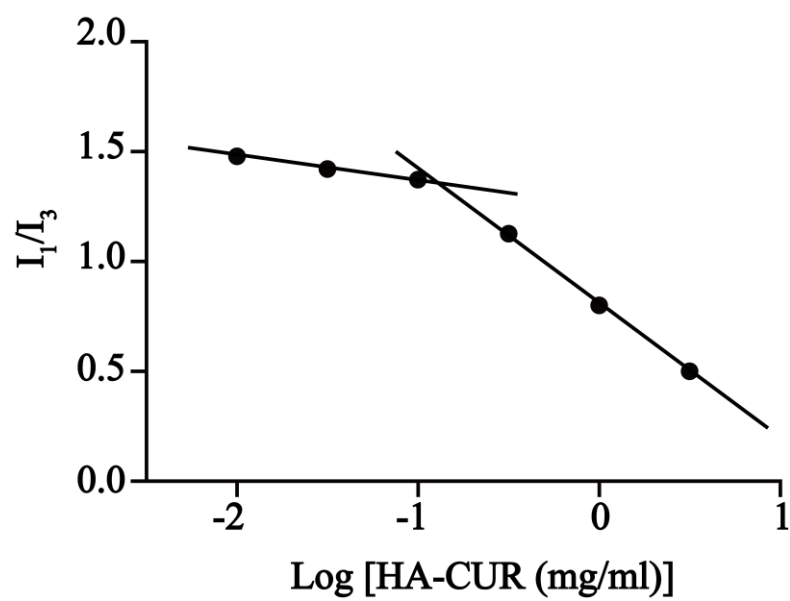

Fig. S1 The cmc of HA-CUR

Supplement: RA-009-C9RA08202F-s001.pdf [file RA-009-C9RA08202F-s001.pdf]
